# Supplementary material for: Customized thermoplastic polyhydroxyurethanes synthesized from ene-containing cyclic carbonates, dithiols and diamines: design, mechanical properties and applications in adhesives
Source: Royal Society of Chemistry journal article supplement (doi:10.1039/d3py00134b), 2023-01-01
Supplement: d3py00134b1.pdf [file d3py00134b1.pdf]

## Supporting Information

### Customized thermoplastic polyhydroxyurethanes synthesized from ene-containing cyclic carbonate, dithiol and diamine: Design, mechanical property and application in adhesive

Weikun Xu,<sup>a</sup> Yutong Ding,<sup>a</sup> Shibin You,<sup>a</sup> Cheng Chao,<sup>b</sup> Bozhen Wu<sup>\*a</sup> and Feng Chen<sup>\*a</sup>

<sup>a</sup> College of Materials Science and Engineering, Zhejiang University of Technology, Hangzhou 310014, P R China.

<sup>b</sup> Zhejiang Zhongli Synthetic Material Technology Co., Ltd. Pinghu 314200, China.

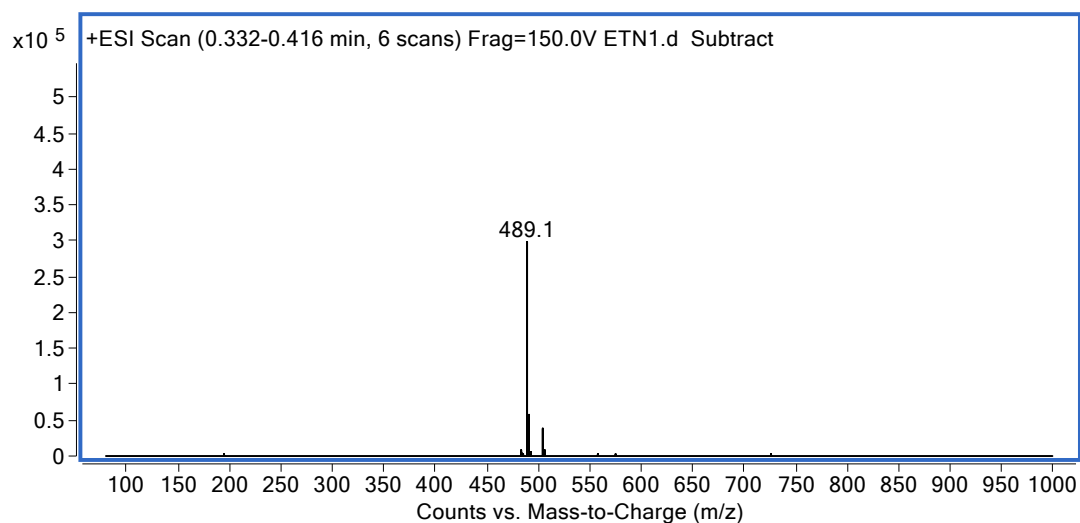

Fig. S1 . ESI-MS spectrum of CC-1

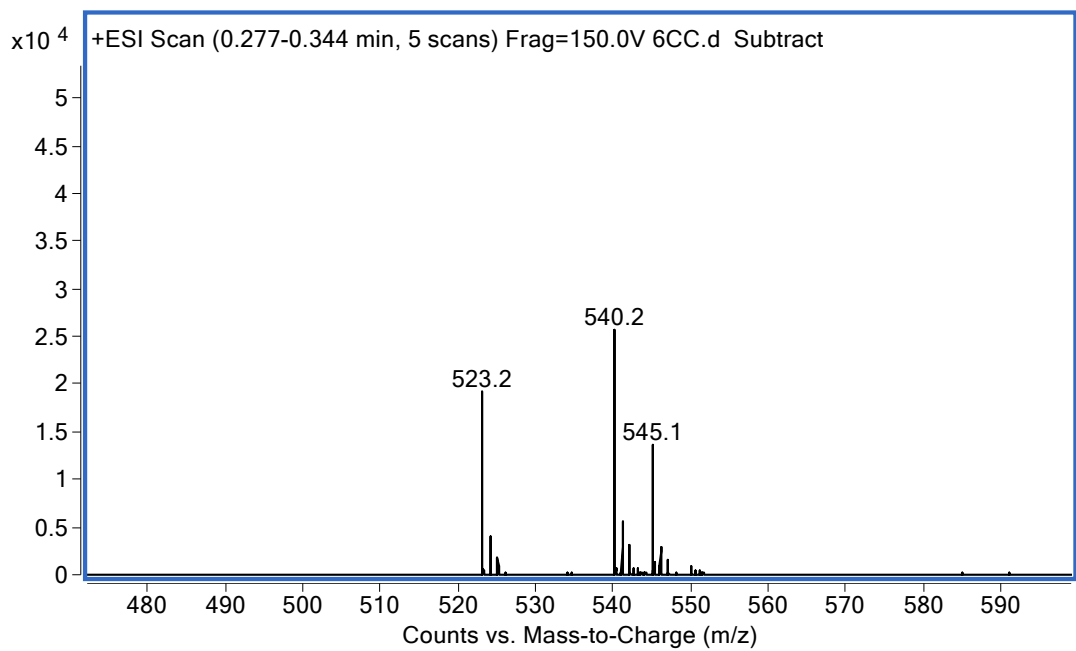

**Fig. S2** ESI-MS spectrum of CC-2

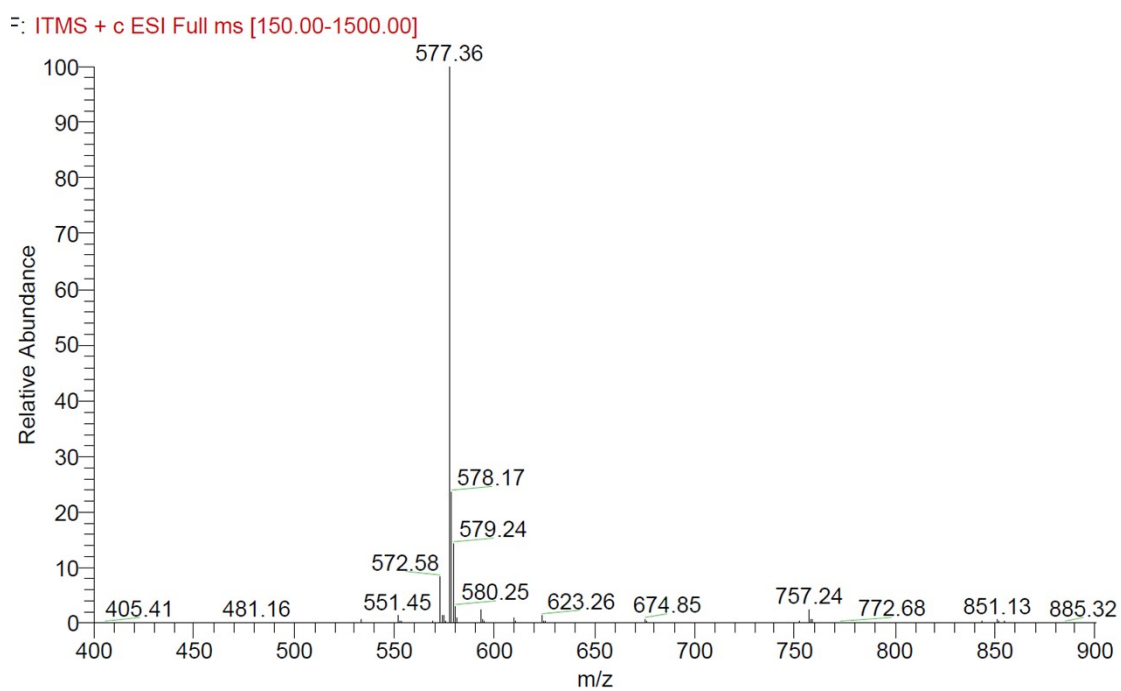

**Fig. S3** ESI-MS spectrum of CC-3

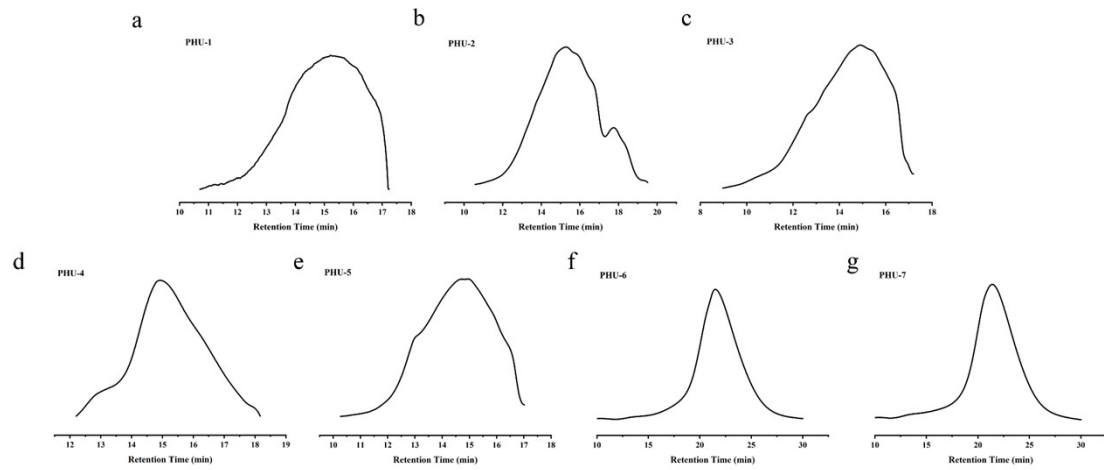

**Fig. S4** GPC spectra of PHUs

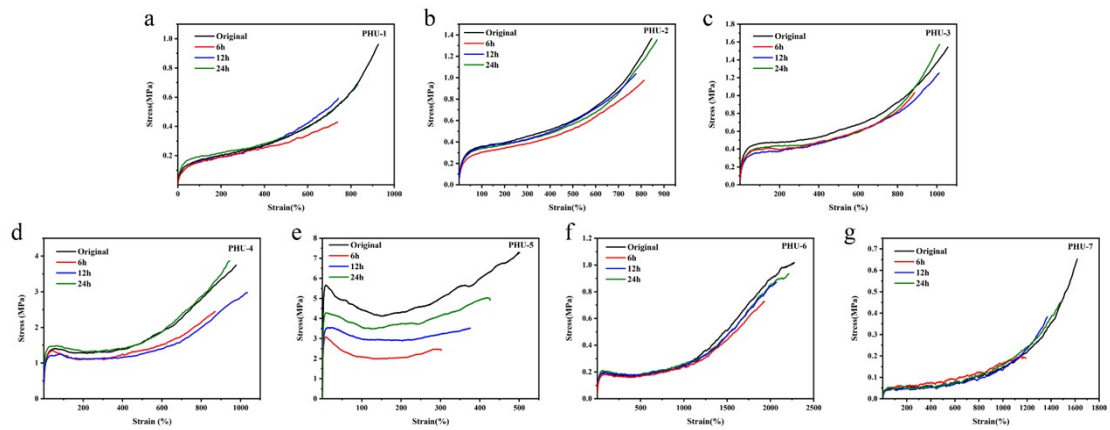

**Fig. S5** Representative stress-strain curves of original PHUs and healing PHUs versus different time

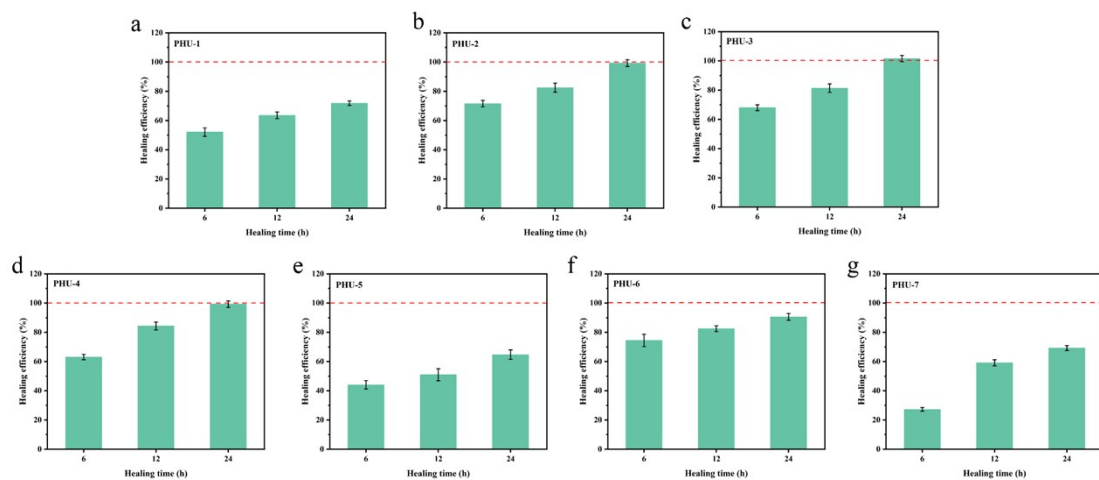

**Fig. S6** Healing efficiency of PHUs versus different times
